# Supplementary material for: VQC-MLPNet: An Unconventional Hybrid Quantum-Classical Architecture for Scalable and Robust Quantum Machine Learning
Source: Research Square preprint supplement (doi:10.21203/rs.3.rs-6735319/v1), 2025-06-09
Supplement: Supplementary file 1 [file e6c0e0f78e29a068b4ba462e.pdf]

## Appendix

*The proofs and analysis of the main theorems*

### Proof of Theorem 1.

Consider a ground truth  $\mathbf{y}$ , a target operator  $h$ , an optimal MLP operator  $f_{\text{mlp}}^*$ , and an VQC-MLPNet operator  $f_{\boldsymbol{\theta}}^*$ . The approximation error  $\epsilon_{\text{app}}$  can be upper bounded using the triangle inequality as:

$$\epsilon_{\text{app}} = \mathcal{R}(f_{\boldsymbol{\theta}}^*) - \mathcal{R}(h^*) \leq |\mathcal{R}(f_{\boldsymbol{\theta}}^*) - \mathcal{R}(f_{\text{mlp}}^*)| + |\mathcal{R}(f_{\text{mlp}}^*) - \mathcal{R}(h^*)|. \quad (1)$$

Moreover, the expected risk  $\mathcal{R}$  is taken as the cross-entropy loss function such that:

$$|\mathcal{R}(f_{\boldsymbol{\theta}}^*) - \mathcal{R}(f_{\text{mlp}}^*)| + |\mathcal{R}(f_{\text{mlp}}^*) - \mathcal{R}(h^*)| \leq L_{\text{ce}} \|f_{\boldsymbol{\theta}}^* - f_{\text{mlp}}^*\|_2 + L_{\text{ce}} \|f_{\text{mlp}}^* - h^*\|_2, \quad (2)$$

where  $L_{\text{ce}}$  is a Lipschitz constant induced by the gradient of the cross-entropy loss function with a softmax activation.

Leveraging Cybenko's universal approximation theory, the term we further derive:

$$\|f_{\boldsymbol{\theta}}^* - f_{\text{mlp}}^*\|_2 \leq \frac{C_1}{\sqrt{M}}. \quad (3)$$

Next, we define  $f_{\text{mlp}}^*$  and  $f_{\boldsymbol{\theta}}^*$  operators explicitly:

$$f_{\text{mlp}}^*(\mathbf{x}) = \mathbf{W}^{(2)\top} \sigma(\mathbf{W}_*^{(1)\top} \mathbf{x}), \quad f_{\boldsymbol{\theta}}^*(\mathbf{x}) = \mathbf{W}^{(2)\top} \sigma(\hat{\mathbf{W}}^{(1)\top} \mathbf{x}), \quad (4)$$

and assuming a Lipschitz-continuous activation function  $\sigma(\cdot)$ , we apply the Cauchy-Swartz inequality, resulting in:

$$\begin{aligned} \|f_{\boldsymbol{\theta}}^* - f_{\text{mlp}}^*\|_2 &= \left\| \mathbf{W}^{(2)\top} \sigma(\hat{\mathbf{W}}^{(1)\top} \mathbf{x}) - \mathbf{W}^{(2)\top} \sigma(\mathbf{W}_*^{(1)\top} \mathbf{x}) \right\|_2 \\ &\leq \max_{1 \leq j \leq J} \left( \sum_{m=1}^M |\mathbf{w}_m^{(2)}(j)| \right) \left\| \sigma(\hat{\mathbf{W}}^{(1)} \mathbf{x}) - \sigma(\mathbf{W}_*^{(1)} \mathbf{x}) \right\|_2 \\ &\leq \max_{1 \leq j \leq J} \left( \sum_{m=1}^M |\mathbf{w}_m^{(2)}(j)| \right) \|\mathbf{x}\|_2 \left\| \hat{\mathbf{W}}^{(1)} - \mathbf{W}_*^{(1)} \right\|_2, \end{aligned} \quad (5)$$

where  $\left\| \hat{\mathbf{W}}^{(1)} - \mathbf{W}_*^{(1)} \right\|_2$  is an induced norm of matrix as:

$$\left\| \hat{\mathbf{W}}^{(1)} - \mathbf{W}_*^{(1)} \right\|_2 = \sup_{\|\mathbf{x}\|_2 \leq 1} \left\| (\hat{\mathbf{W}}^{(1)} - \mathbf{W}_*^{(1)}) \mathbf{x} \right\|_2. \quad (6)$$

Next, we consider  $\hat{\mathbf{W}}_Q^{(1)}$  as:

$$\hat{\mathbf{W}}_Q^{(1)} = \left[ |\hat{\mathbf{w}}_1^{(1)}\rangle, |\hat{\mathbf{w}}_2^{(1)}\rangle, \dots, |\hat{\mathbf{w}}_D^{(1)}\rangle \right] \quad (7)$$

Then, using the triangle inequality, we have:

$$\begin{aligned} \left\| \hat{\mathbf{W}}^{(1)} - \mathbf{W}_*^{(1)} \right\|_2 &= \left\| \hat{\mathbf{W}}^{(1)} - \hat{\mathbf{W}}_Q^{(1)} + \hat{\mathbf{W}}_Q^{(1)} - \mathbf{W}_*^{(1)} \right\|_2 \\ &\leq \underbrace{\left\| \hat{\mathbf{W}}^{(1)} - \hat{\mathbf{W}}_Q^{(1)} \right\|_2}_{r_{\text{enc}}} + \underbrace{\left\| \hat{\mathbf{W}}_Q^{(1)} - \mathbf{W}_*^{(1)} \right\|_2}_{r_{\text{exp}}}. \end{aligned} \quad (8)$$

On the one hand, the term  $\left\| \hat{\mathbf{W}}^{(1)} - \hat{\mathbf{W}}_Q^{(1)} \right\|_2$  corresponds to the error associated with amplitude encoding. The  $L_{2,2}$  group norm of  $\left\| \hat{\mathbf{W}}^{(1)} - \hat{\mathbf{W}}_Q^{(1)} \right\|_2$  is:

$$\left\| \hat{\mathbf{W}}^{(1)} - \hat{\mathbf{W}}_Q^{(1)} \right\|_2 = \left[ \sum_{d=1}^D \left\| \hat{\mathbf{w}}_d^{(1)} - |\hat{\mathbf{w}}_d^{(1)}\rangle \right\|_2^2 \right]^{\frac{1}{2}}. \quad (9)$$

By the definition of amplitude encoding, it requires normalized input vectors that cannot preserve all the information from the classical data, leading to the encoding error of each  $\left\| \hat{\mathbf{w}}_d^{(1)} - |\hat{\mathbf{w}}_d^{(1)}\rangle \right\|_2^2$  that scales as:

$$\left\| \hat{\mathbf{w}}_d^{(1)} - |\hat{\mathbf{w}}_d^{(1)}\rangle \right\|_2^2 \leq \mathcal{O} \left( \frac{1}{2^{\beta_1 U}} \right), \quad (10)$$

where the constant  $\beta_1 \in (0, 1]$  is a scaling factor. The above term means that for a scaling factor  $\beta \in (0, \frac{1}{2}]$ , we have:

$$r_{\text{enc}} = \left[ \sum_{d=1}^D \left\| \hat{\mathbf{w}}_d^{(1)} - |\hat{\mathbf{w}}_d^{(1)}\rangle \right\|_2^2 \right]^{\frac{1}{2}} \leq \mathcal{O} \left( \frac{1}{2^{\beta U}} \right). \quad (11)$$

On the other hand, we consider the expressive error  $r_{\text{exp}}$  as the term of  $L_{2,2}$  group norm:

$$r_{\text{exp}} = \left\| \hat{\mathbf{W}}_Q^{(1)} - \mathbf{W}_*^{(1)} \right\|_2 = \left[ \sum_{d=1}^D \left\| |\hat{\mathbf{w}}_d^{(1)}\rangle - \mathbf{w}_*^{(1)} \right\|_2^2 \right]^{\frac{1}{2}}. \quad (12)$$

For each  $\left\| |\hat{\mathbf{w}}_d^{(1)}\rangle - \mathbf{w}_*^{(1)} \right\|_2^2$ , given a decaying factor  $\alpha_1 > 0$ , since the target matrix  $\mathbf{W}^*$  is smooth, we leverage the quantum Fourier-like expansion technique and exponential decay of coefficients, we have:

$$\left\| |\hat{\mathbf{w}}_d^{(1)}\rangle - \mathbf{w}_*^{(1)} \right\|_2^2 \leq \sum_{l>L} |c_l| \leq \mathcal{O} (e^{-\alpha_1 L}). \quad (13)$$

Then, for a constant  $C_2 > 0$  and  $\alpha = 2\alpha_1 > 0$ , we have:

$$r_{\text{exp}} = \left[ \sum_{d=1}^D \left\| |\hat{\mathbf{w}}_d^{(1)}\rangle - \mathbf{w}_*^{(1)} \right\|_2^2 \right]^{\frac{1}{2}} \leq \mathcal{O} (e^{-\alpha L}). \quad (14)$$

To sum up, for two constants  $C_2 > 0$  and  $C_3 > 0$ , we have:

$$\begin{aligned} \|f_{\boldsymbol{\theta}^*} - f_{\text{mlp}}^*\|_2 &\leq \max_{1 \leq j \leq J} \left( \sum_{m=1}^M |\mathbf{w}_m^{(2)}(j)| \right) \|\mathbf{x}\|_2 \left\| \hat{\mathbf{W}}^{(1)} - \mathbf{W}_*^{(1)} \right\|_2 \\ &\leq C_2 e^{-\alpha L} + \frac{C_3}{2^{\beta U}}. \end{aligned} \quad (15)$$

Finally, we obtain the upper bound as:

$$\epsilon_{\text{app}} \leq \|f_{\boldsymbol{\theta}^*} - f_{\text{mlp}}^*\|_2 + \|f_{\text{mlp}}^* - h^*\|_2 \leq \frac{C_1}{\sqrt{M}} + C_2 e^{-\alpha L} + \frac{C_3}{2^{\beta U}}. \quad (16)$$

**The NTK Technique for VQC-MLPNet's Trainability.** To analyze the trainability of the MLP-VQC model, we consider the operator  $f_{\text{vm}}$  with a quantum-enhanced weight  $\hat{\mathbf{W}}^{(1)} = f_{\text{lin}} \circ f_{\text{vqc}} \circ f_{\text{ae}}(\mathbf{W}^{(1)})$ , where  $f_{\text{vqc}}$  is parameterized by  $\boldsymbol{\theta}_{\text{vqc}} = \{\alpha_{1:U}, \beta_{1:U}, \gamma_{1:U}\}$ , and the final layer uses classical weights  $\boldsymbol{\theta}_{W^{(2)}}$ .

The MLP-VQC operator is given by:

$$f_{\boldsymbol{\theta}}(\mathbf{x}) = \frac{1}{\sqrt{M}} \sum_{m=1}^M \mathbf{w}_m^{(2)} \sigma \left( \langle \hat{\mathbf{w}}_m^{(1)}, \mathbf{x} \rangle \right). \quad (17)$$

As for the gradient descent of  $f_{\text{vm}}$  w.r.t.  $\alpha_u, \beta_u, \gamma_u$  and  $\mathbf{w}_m^{(2)}$ , we have:

$$\frac{\partial f_{\boldsymbol{\theta}}}{\partial \alpha_u} = \frac{1}{\sqrt{M}} \sum_{m=1}^M \mathbf{w}_m^{(2)} \sigma' \left( \langle \hat{\mathbf{w}}_m^{(1)}, \mathbf{x} \rangle \right) \left( \left\langle \frac{\partial \hat{\mathbf{w}}_m^{(1)}}{\partial \alpha_u}, \mathbf{x} \right\rangle \right) \quad (18)$$

$$\frac{\partial f_{\boldsymbol{\theta}}}{\partial \beta_u} = \frac{1}{\sqrt{M}} \sum_{m=1}^M \mathbf{w}_m^{(2)} \sigma' \left( \langle \hat{\mathbf{w}}_m^{(1)}, \mathbf{x} \rangle \right) \left( \left\langle \frac{\partial \hat{\mathbf{w}}_m^{(1)}}{\partial \beta_u}, \mathbf{x} \right\rangle \right) \quad (19)$$

$$\frac{\partial f_{\boldsymbol{\theta}}}{\partial \gamma_u} = \frac{1}{\sqrt{M}} \sum_{m=1}^M \mathbf{w}_m^{(2)} \sigma' \left( \langle \hat{\mathbf{w}}_m^{(1)}, \mathbf{x} \rangle \right) \left( \left\langle \frac{\partial \hat{\mathbf{w}}_m^{(1)}}{\partial \gamma_u}, \mathbf{x} \right\rangle \right) \quad (20)$$

$$\frac{\partial f_{\text{vm}}}{\partial \boldsymbol{\theta}_{W^{(2)}}} = \frac{1}{\sqrt{M}} \sigma \left( \langle \hat{\mathbf{w}}_m^{(1)}, \mathbf{x} \rangle \right) \quad (21)$$

In particular,  $\frac{\partial \hat{\mathbf{w}}_m^{(1)}}{\partial \alpha_u} = f_{\text{lin}} \circ \frac{\partial f_{\text{vqc}}}{\partial \alpha_u} \circ f_{\text{ae}}(\mathbf{w}_m^{(1)})$  relies on the VQC's architecture and is not related to the weight parameters  $\mathbf{w}_m^{(1)}$ . Accordingly, we define a constant  $C_{\alpha}$  and obtain:

$$\sum_{u=1}^U \left( \frac{\partial \hat{\mathbf{w}}_m^{(1)}}{\partial \alpha_u} \right)^{\top} \left( \frac{\partial \hat{\mathbf{w}}_m^{(1)}}{\partial \alpha_u} \right) = C_{\alpha}. \quad (22)$$

Similarly, given the constants  $C_{\beta}$  and  $C_{\gamma}$ , we obtain the following terms:

$$\sum_{u=1}^U \left( \frac{\partial \hat{\mathbf{w}}_m^{(1)}}{\partial \beta_u} \right)^{\top} \left( \frac{\partial \hat{\mathbf{w}}_m^{(1)}}{\partial \beta_u} \right) = C_{\beta}, \quad (23)$$

$$\sum_{u=1}^U \left( \frac{\partial \hat{\mathbf{w}}_m^{(1)}}{\partial \gamma_u} \right)^\top \left( \frac{\partial \hat{\mathbf{w}}_m^{(1)}}{\partial \gamma_u} \right) = C_\gamma. \quad (24)$$

Next, we define the NTK  $\mathcal{K}_{\text{vm}}$  as:

$$\mathcal{K}_{\text{vm}} = \mathcal{K}_{\text{vqc}} + \mathcal{K}_{W^{(2)}}. \quad (25)$$

Since the VQC component of the NTK can be decomposed into contributions from the parameterized quantum gates, for any two data vectors  $\mathbf{x}_1$  and  $\mathbf{x}_2$ , the related NTK  $\mathcal{K}_{\text{vqc}}(\mathbf{x}_1, \mathbf{x}_2)$  can be further decomposed as:

$$\mathcal{K}_{\text{vqc}}(\mathbf{x}_1, \mathbf{x}_2) = \mathcal{K}_{\text{vqc}}^{(\alpha)}(\mathbf{x}_1, \mathbf{x}_2) + \mathcal{K}_{\text{vqc}}^{(\beta)}(\mathbf{x}_1, \mathbf{x}_2) + \mathcal{K}_{\text{vqc}}^{(\gamma)}(\mathbf{x}_1, \mathbf{x}_2). \quad (26)$$

Each component is computed over the quantum-enhanced features. For instance, given a constant  $C_\alpha$ , the  $\alpha$ -parameter NTK contribution is:

$$\begin{aligned} \mathcal{K}_{\text{vqc}}^{(\alpha)}(\mathbf{x}_1, \mathbf{x}_2) &= \sum_{u=1}^U \left\langle \frac{\partial f_{\text{vm}}}{\partial \alpha_u}, \frac{\partial f_{\text{vm}}}{\partial \alpha_u} \right\rangle \\ &= \frac{1}{M} \sum_{m=1}^M (\mathbf{w}_m^{(2)})^2 \sigma'(\langle \hat{\mathbf{w}}_m^{(1)}, \mathbf{x}_1 \rangle) \sigma'(\langle \hat{\mathbf{w}}_m^{(1)}, \mathbf{x}_2 \rangle) \sum_{u=1}^U \left\langle \frac{\partial \hat{\mathbf{w}}_m^{(1)}}{\partial \alpha_u} \mathbf{x}_1, \frac{\partial \hat{\mathbf{w}}_m^{(1)}}{\partial \alpha_u} \mathbf{x}_2 \right\rangle \\ &= \frac{1}{M} \sum_{m=1}^M (\mathbf{w}_m^{(2)})^2 \sigma'(\langle \hat{\mathbf{w}}_m^{(1)}, \mathbf{x}_1 \rangle) \sigma'(\langle \hat{\mathbf{w}}_m^{(1)}, \mathbf{x}_2 \rangle) \langle \mathbf{x}_1, C_\alpha \mathbf{x}_2 \rangle, \end{aligned} \quad (27)$$

With similar expressions for  $\mathcal{K}_{\text{vqc}}^{(\beta)}$  and  $\mathcal{K}_{\text{vqc}}^{(\gamma)}$  using constants  $C_\beta$  and  $C_\gamma$ , we obtain

$$\begin{aligned} \mathcal{K}_{\text{vqc}}^{(\beta)}(\mathbf{x}_1, \mathbf{x}_2) &= \sum_{u=1}^U \left\langle \frac{\partial f_{\text{vm}}}{\partial \beta_u}, \frac{\partial f_{\text{vm}}}{\partial \beta_u} \right\rangle \\ &= \frac{1}{M} \sum_{m=1}^M (\mathbf{w}_m^{(2)})^2 \sigma'(\langle \hat{\mathbf{w}}_m^{(1)}, \mathbf{x}_1 \rangle) \sigma'(\langle \hat{\mathbf{w}}_m^{(1)}, \mathbf{x}_2 \rangle) \sum_{u=1}^U \left\langle \frac{\partial \hat{\mathbf{w}}_m^{(1)}}{\partial \beta_u} \mathbf{x}_1, \frac{\partial \hat{\mathbf{w}}_m^{(1)}}{\partial \beta_u} \mathbf{x}_2 \right\rangle \\ &= \frac{1}{M} \sum_{m=1}^M (\mathbf{w}_m^{(2)})^2 \sigma'(\langle \hat{\mathbf{w}}_m^{(1)}, \mathbf{x}_1 \rangle) \sigma'(\langle \hat{\mathbf{w}}_m^{(1)}, \mathbf{x}_2 \rangle) \langle \mathbf{x}_1, C_\beta \mathbf{x}_2 \rangle, \end{aligned} \quad (28)$$

$$\begin{aligned} \mathcal{K}_{\text{vqc}}^{(\gamma)}(\mathbf{x}_1, \mathbf{x}_2) &= \sum_{u=1}^U \left\langle \frac{\partial f_{\text{vm}}}{\partial \gamma_u}, \frac{\partial f_{\text{vm}}}{\partial \gamma_u} \right\rangle \\ &= \frac{1}{M} \sum_{m=1}^M (\mathbf{w}_m^{(2)})^2 \sigma'(\langle \hat{\mathbf{w}}_m^{(1)}, \mathbf{x}_1 \rangle) \sigma'(\langle \hat{\mathbf{w}}_m^{(1)}, \mathbf{x}_2 \rangle) \sum_{u=1}^U \left\langle \frac{\partial \hat{\mathbf{w}}_m^{(1)}}{\partial \gamma_u} \mathbf{x}_1, \frac{\partial \hat{\mathbf{w}}_m^{(1)}}{\partial \gamma_u} \mathbf{x}_2 \right\rangle \\ &= \frac{1}{M} \sum_{m=1}^M (\mathbf{w}_m^{(2)})^2 \sigma'(\langle \hat{\mathbf{w}}_m^{(1)}, \mathbf{x}_1 \rangle) \sigma'(\langle \hat{\mathbf{w}}_m^{(1)}, \mathbf{x}_2 \rangle) \langle \mathbf{x}_1, C_\gamma \mathbf{x}_2 \rangle. \end{aligned} \quad (29)$$

Moreover, the classical linear layer NTK is given by:

$$\mathcal{K}_{W^{(2)}}(\mathbf{x}_1, \mathbf{x}_2) = \left\langle \frac{\partial f_{\text{vm}}}{\partial \boldsymbol{\theta}_{W^{(2)}}}, \frac{\partial f_{\text{vm}}}{\partial \boldsymbol{\theta}_{W^{(2)}}} \right\rangle = \frac{1}{M} \sum_{m=1}^M \sigma'(\langle \hat{\mathbf{w}}_m^{(1)}, \mathbf{x}_1 \rangle) \sigma'(\langle \hat{\mathbf{w}}_m^{(1)}, \mathbf{x}_2 \rangle). \quad (30)$$

In the infinite-width limit  $M \rightarrow \infty$ , the NTKs converge to their expected values under the initialization distribution. This yields constant kernels for each component (Eqs. 31-32), enabling analytical tractability of convergence behavior.

$$\mathcal{K}_{\text{vqc}}^{(\alpha)}(\mathbf{x}_1, \mathbf{x}_2) \xrightarrow{M \rightarrow \infty} \mathbb{E}_{(\boldsymbol{\theta}_{\text{vqc}}, \boldsymbol{\theta}_{W^{(2)}})} \left[ (\mathbf{w}_m^{(2)})^2 \sigma'(\langle \hat{\mathbf{w}}_m^{(1)}, \mathbf{x}_1 \rangle) \sigma'(\langle \hat{\mathbf{w}}_m^{(1)}, \mathbf{x}_2 \rangle) \langle \mathbf{x}_1, C_\alpha \mathbf{x}_2 \rangle \right], \quad (31)$$

$$\mathcal{K}_{\text{vqc}}^{(\beta)}(\mathbf{x}_1, \mathbf{x}_2) \xrightarrow{M \rightarrow \infty} \mathbb{E}_{(\boldsymbol{\theta}_{\text{vqc}}, \boldsymbol{\theta}_{W^{(2)}})} \left[ (\mathbf{w}_m^{(2)})^2 \sigma'(\langle \hat{\mathbf{w}}_m^{(1)}, \mathbf{x}_1 \rangle) \sigma'(\langle \hat{\mathbf{w}}_m^{(1)}, \mathbf{x}_2 \rangle) \langle \mathbf{x}_1, C_\beta \mathbf{x}_2 \rangle \right], \quad (32)$$

$$\mathcal{K}_{\text{vqc}}^{(\gamma)}(\mathbf{x}_1, \mathbf{x}_2) \xrightarrow{M \rightarrow \infty} \mathbb{E}_{(\boldsymbol{\theta}_{\text{vqc}}, \boldsymbol{\theta}_{W^{(2)}})} \left[ (\mathbf{w}_m^{(2)})^2 \sigma'(\langle \hat{\mathbf{w}}_m^{(1)}, \mathbf{x}_1 \rangle) \sigma'(\langle \hat{\mathbf{w}}_m^{(1)}, \mathbf{x}_2 \rangle) \langle \mathbf{x}_1, C_\gamma \mathbf{x}_2 \rangle \right], \quad (33)$$

$$\mathcal{K}_{W^{(2)}}(\mathbf{x}_1, \mathbf{x}_2) \xrightarrow{M \rightarrow \infty} \mathbb{E}_{\boldsymbol{\theta}_{\text{vqc}}} \left[ \sigma'(\langle \hat{\mathbf{w}}_m^{(1)}, \mathbf{x}_1 \rangle) \sigma'(\langle \hat{\mathbf{w}}_m^{(1)}, \mathbf{x}_2 \rangle) \right]. \quad (34)$$

Thus, the over-parameterized regime (large-width) ensures the NTK  $\mathcal{K}_{\text{vm}}$  remains nearly constant throughout training. We then compute the minimum eigenvalue  $\lambda_{\min}(\mathcal{K}_{\text{vm}})$ . Since classical kernels often have better-conditioned NTKs, introducing the classical component can boost the lowest eigenvalue:  $\lambda_{\min}(\mathcal{K}_{\text{vm}}) \gg \lambda_{\min}(\mathcal{K}_{W^{(2)}})$ .

Next, we prove the upper bound on the optimization error based on the constant NTK  $\mathcal{K}_{\text{vm}}$  and  $\lambda_{\min}(\mathcal{K}_{\text{vm}})$ . Given the set of training data  $\{(\mathbf{x}_1, y_1), (\mathbf{x}_2, y_2), \dots, (\mathbf{x}_N, y_N)\}$ , we aim to minimize the cross-entropy loss:

$$\hat{\mathcal{R}}(f_{\boldsymbol{\theta}}) = -\frac{1}{N} \sum_{n=1}^N y_n \log(\sigma_c(f_{\boldsymbol{\theta}}(\mathbf{x}_n))), \quad (35)$$

where  $\sigma_c(\cdot)$  denotes the softmax probabilities. Since the parameter update follows gradient flow dynamics:

$$\frac{d\boldsymbol{\theta}}{dt} = -\nabla_{\boldsymbol{\theta}} \hat{\mathcal{R}}(f_{\boldsymbol{\theta}}), \quad (36)$$

we have:

$$\frac{d}{dt} f_{\boldsymbol{\theta}}(\mathbf{X}) = \frac{df_{\boldsymbol{\theta}}}{d\boldsymbol{\theta}} \frac{d\boldsymbol{\theta}}{dt} = -\mathcal{K}_{\text{vm}} \cdot (\sigma_c(f_{\boldsymbol{\theta}}(\mathbf{X})) - \mathbf{y}), \quad (37)$$

where we define the data matrix  $\mathbf{X} = [\mathbf{x}_1 \mathbf{x}_2 \dots \mathbf{x}_N]$  and the label vector  $\mathbf{y} = [y_1 y_2 \dots y_N]^\top$ .

Furthermore, due to the nonlinearity of the activation function  $\sigma_c(\cdot)$ , we further simplify it by expanding the softmax around the initial predictions. Typically, this linearization approximation is:

$$\sigma_c(f_{\boldsymbol{\theta}_t}(\mathbf{X})) \approx \sigma_c(f_{\boldsymbol{\theta}_0}(\mathbf{X})) + \nabla_{\boldsymbol{\theta}} f_{\boldsymbol{\theta}_0}(\mathbf{X})^\top (f_{\boldsymbol{\theta}_t}(\mathbf{X}) - f_{\boldsymbol{\theta}_0}(\mathbf{X})), \quad (38)$$

Now we have a linear, time-invariant ordinary differential equation (ODE):

$$\frac{d}{dt}f_{\theta_t}(\mathbf{X}) \approx -\mathcal{K}_{\text{vm}} \cdot ([\sigma_c(f_{\theta_0}(\mathbf{X})) - \mathbf{y}] + \nabla_{\theta}f_{\theta_0}(\mathbf{X})^{\top}(f_{\theta_t}(\mathbf{X}) - f_{\theta_0}(\mathbf{X}))). \quad (39)$$

Define the perturbation around initialization as  $u(t) = f_{\theta_t}(\mathbf{X}) - f_{\theta_0}(\mathbf{X})$ . Then, the linearized gradient flow dynamics can be written explicitly:

$$\frac{d}{dt}u(t) = -\mathcal{K}_{\text{vm}} \cdot \nabla_{\theta}f_{\theta_0}(\mathbf{X})u(t) - \mathcal{K}_{\text{vm}} \cdot (\sigma_c(f_{\theta_0}(\mathbf{X})) - \mathbf{y}), \quad (40)$$

which becomes a linear, time-invariant ODE system:

- Initial condition:  $u(0) = 0$ .
- Define the matrices clearly:

$$A = \mathcal{K}_{\text{vm}} \cdot \nabla_{\theta}(f_{\theta_0}(\mathbf{X})), \quad b = \mathcal{K}_{\text{vm}} \cdot (\sigma_c(f_{\theta_0}(\mathbf{X})) - \mathbf{y}). \quad (41)$$

Then, the solution for the prediction evolution is:

$$u(t) = -A^{-1}(I - e^{-At})b. \quad (42)$$

Thus, we obtain:

$$f_{\theta_t}(\mathbf{X}) = f_{\theta_0}(\mathbf{X}) - (\nabla_{\theta}f_{\theta_0}(\mathbf{X}))^{-1} (I - e^{-\mathcal{K}_{\text{vm}} \cdot \nabla_{\theta}f_{\theta_0}(\mathbf{X})t}) (\sigma_c(f_{\theta_0}(\mathbf{X})) - \mathbf{y}). \quad (43)$$

To minimize  $\tilde{f}_{\theta_t}(\mathbf{X})$ , we obtain the optimal  $\theta^*$  such that

$$f_{\theta^*}(\mathbf{X}) = f_{\theta_{\infty}}(\mathbf{X}) = f_{\theta_0}(\mathbf{X}) - (\nabla_{\theta}f_{\theta_0}(\mathbf{X}))^{-1}(\sigma_c(f_{\theta_0}(\mathbf{X})) - \mathbf{y}). \quad (44)$$

As for the optimization error  $\epsilon_{\text{opt}}$ , at epoch  $t$ , we set  $\theta_t = \hat{\theta}$  and further derive that:

$$\begin{aligned} \sup_{\hat{\theta} \in \Theta} \left( \hat{\mathcal{R}}(f_{\hat{\theta}}) - \hat{\mathcal{R}}(f_{\theta^*}) \right) &\leq L_{\text{ce}} \|f_{\theta_t}(\mathbf{X}) - f_{\theta^*}(\mathbf{X})\|_2 \\ &= L_{\text{ce}} \|(\nabla_{\theta}f_{\theta_0}(\mathbf{X}))^{-1} e^{-\mathcal{K}_{\text{vm}} \cdot \nabla_{\theta}f_{\theta_0}(\mathbf{X})t} (\sigma_c(f_{\theta_0}(\mathbf{X})) - \mathbf{y})\|_2 \\ &\leq L_{\text{ce}} \|(\nabla_{\theta}f_{\theta_0}(\mathbf{X}))^{-1}\|_2 \|e^{-\mathcal{K}_{\text{vm}} \cdot \nabla_{\theta}f_{\theta_0}(\mathbf{X})t}\|_2 \|\sigma_c(f_{\theta_0}(\mathbf{X})) - \mathbf{y}\|_2. \end{aligned} \quad (45)$$

Using the technique of eigen-decomposition:  $e^{-\mathcal{K}_{\text{vm}} \cdot \nabla_{\theta}f_{\theta_0}(\mathbf{X})t} = Ue^{-\Lambda t}U^{\top}$  and  $e^{-\Lambda t} = \text{diag}(e^{-\lambda_1 t}, \dots, e^{-\lambda_n t})$ , our expression becomes simpler:

$$\sup_{\hat{\theta} \in \Theta} \left( \hat{\mathcal{R}}(f_{\hat{\theta}}) - \hat{\mathcal{R}}(f_{\theta^*}) \right) \leq L_{\text{ce}} \|(\nabla_{\theta}f_{\theta_0}(\mathbf{X}))^{-1}\|_2 \|Ue^{-\Lambda t}U^{\top}\|_2 \|\sigma_c(f_{\theta_0}(\mathbf{X})) - \mathbf{y}\|_2. \quad (46)$$

Since  $U$  is orthogonal, it doesn't affect the operator norm ( $\|U\|_2 = 1$ ), and we use the tricks:

$$\|(\nabla_{\theta}f_{\theta_0}(\mathbf{X}))^{-1}\|_2 = \frac{1}{\lambda_{\min}(\nabla_{\theta}f_{\theta_0}(\mathbf{X}))}, \quad (47)$$

$$\|e^{-\mathcal{K}_{\text{vm}} \cdot \nabla_{\boldsymbol{\theta}} f_{\boldsymbol{\theta}_0}(\mathbf{X})t}\|_2 = \max_i e^{-\lambda_i(\mathcal{K}_{\text{vm}} \cdot \nabla_{\boldsymbol{\theta}} f_{\boldsymbol{\theta}_0}(\mathbf{X}))t} = e^{-\lambda_{\min}(\mathcal{K}_{\text{vm}} \cdot \nabla_{\boldsymbol{\theta}} f_{\boldsymbol{\theta}_0}(\mathbf{X}))t}. \quad (48)$$

Then, we can upper bound the optimization error  $\epsilon_{\text{opt}}$  as:

$$\epsilon_{\text{opt}} = \sup_{\hat{\boldsymbol{\theta}} \in \Theta} \left( \hat{\mathcal{R}}(f_{\hat{\boldsymbol{\theta}}}) - \hat{\mathcal{R}}(f_{\boldsymbol{\theta}^*}) \right) \leq L_{\text{ce}} \frac{\|\sigma_c(f_{\boldsymbol{\theta}_0}(\mathbf{X})) - \mathbf{y}\|_2}{\lambda_{\min}(\nabla_{\boldsymbol{\theta}} f_{\boldsymbol{\theta}_0}(\mathbf{X}))} e^{-\lambda_{\min}(\mathcal{K}_{\text{vm}} \cdot \nabla_{\boldsymbol{\theta}} f_{\boldsymbol{\theta}_0}(\mathbf{X}))t}. \quad (49)$$

In practice, since the term  $\nabla_{\boldsymbol{\theta}} f_{\boldsymbol{\theta}_0}(\mathbf{x})$  is typically bounded and stable, the primary determinant of convergence rate is the minimum eigenvalue  $\lambda_{\min}(\mathcal{K}_{\text{vm}})$ . Thus, we simplify the above term as:

$$\epsilon_{\text{opt}} = \sup_{\hat{\boldsymbol{\theta}} \in \Theta} \left( \hat{\mathcal{R}}(f_{\hat{\boldsymbol{\theta}}}) - \hat{\mathcal{R}}(f_{\boldsymbol{\theta}^*}) \right) \leq C_0 e^{-\lambda_{\min}(\mathcal{K}_{\text{vm}})t}, \quad (50)$$

where the constant  $C_0 = \frac{L_{\text{ce}} \|\sigma_c(f_{\boldsymbol{\theta}_0}(\mathbf{X})) - \mathbf{y}\|_2}{\lambda_{\min}(\nabla_{\boldsymbol{\theta}} f_{\boldsymbol{\theta}_0}(\mathbf{X}))}$ .
